# Supplementary material for: Isolation and characterization of novel bat paramyxovirus B16-40 potentially belonging to the proposed genus Shaanvirus
Source: PubMed Central journal article supplement (PMC6105681; doi:10.1038/s41598-018-30319-7), 2018-08-22
Supplement: 41598_2018_30319_MOESM1_ESM.pdf [file 41598_2018_30319_MOESM1_ESM.pdf]

**Isolation and characterization of novel bat paramyxovirus B16-40 potentially belonging to the proposed genus *Shaanvirus***

Ji Yeong Noh<sup>1,2,\*</sup>, Dae Gwin Jeong<sup>1,3,\*</sup>, Sun-Woo Yoon<sup>1,3</sup>, Ji Hyung Kim<sup>1</sup>, Yong Gun Choi<sup>4</sup>,  
Shien-Young Kang<sup>2,\*\*</sup>, Hye Kwon Kim<sup>1,\*\*</sup>

<sup>1</sup>*Infectious Diseases Research Center, Korea Research Institute of Bioscience and Biotechnology, Daejeon, Republic of Korea*

<sup>2</sup>*College of Veterinary Medicine, Chungbuk National University, Cheongju 28644, Republic of Korea*

<sup>3</sup>*Bio-Analytical Science Division, University of Science and Technology (UST), Daejeon, Republic of Korea*

<sup>4</sup>*The Korean Institute of Biospeleology, Daejeon, Republic of Korea*

\* These authors contributed equally to this work

\*\* These authors are co-corresponding authors

Address correspondence to Shien-Young Kang, [skykang@cbu.ac.kr](mailto:skykang@cbu.ac.kr); Hye Kwon Kim, [khk1329@kribb.re.kr](mailto:khk1329@kribb.re.kr)

**Supplementary table S1. Bat samples information**

| Cases | Region   | Site name         | Collected date | Major bat species                               | No. of samples |       |           |
|-------|----------|-------------------|----------------|-------------------------------------------------|----------------|-------|-----------|
|       |          |                   |                |                                                 | feces          | urine | oral swab |
| 1     | Munhyung | HG abandoned mine | 16-Mar-16      | Miniopterus                                     | 3              |       |           |
| 2     | Hapchoen | BT cave           | 16-Mar-16      | Miniopterus                                     | 2              | 1     |           |
|       |          |                   | 18-May-16      |                                                 | 2              | 2     | 8         |
|       |          |                   | 28-Aug-16      |                                                 | 3              | 1     | 2         |
|       |          |                   | 08-Oct-16      |                                                 | 2              | 1     |           |
| 3     | Jeju     | USJ cave          | 21-Mar-16      | Rhinolophus ferrumequinum                       | 1              | 1     | 2         |
| 4     | Jeju     | MJ cave           | 21-Mar-16      | Rhinolophus ferrumequinum                       | 1              |       | 3         |
| 5     | Seogwipo | artificial cave   | 22-Mar-16      | Miniopterus                                     | 1              | 1     |           |
|       |          |                   | 18-Aug-16      |                                                 | 2              |       | 1         |
| 6     | Jeju     | artificial cave   | 23-Mar-16      | Rhinolophus ferrumequinum, Myotis bombinus      | 1              |       | 1         |
| 7     | Seogwipo | HDR cave          | 23-Mar-16      | Miniopterus                                     | 1              | 1     | 1         |
|       |          |                   | 14-Dec-16      | Rhinolophus ferrumequinum                       | 1              |       | 3         |
| 8     | Jungsun  | HPDPN cave        | 20-Mar-16      | Rhinolophus ferrumequinum                       | 1              |       |           |
| 9     | Jindo    | SJ cave           | 25-Mar-16      | Rhinolophus ferrumequinum, Myotis macrodactylus | 2              | 2     | 2         |
| 10    | Moan     | UJD cave          | 26-Mar-16      | Rhinolophus ferrumequinum                       |                | 1     | 1         |
| 11    | Moan     | SP cave           | 26-Mar-16      | Rhinolophus ferrumequinum, Myotis macrodactylus |                | 2     | 2         |
| 12    | Moan     | IS cave           | 26-Mar-16      | Rhinolophus ferrumequinum                       |                | 1     | 1         |
| 13    | Danyang  | G cave            | 10-Apr-16      | Miniopterus, Murina ussuriensis                 | 2              |       |           |
|       |          |                   | 16-Apr-16      |                                                 | 2              |       |           |
|       |          |                   | 27-Jun-16      |                                                 | 11             | 1     | 4         |
|       |          |                   | 13-Oct-16      |                                                 | 3              |       | 1         |
| 14    | Danyang  | G cave            | 17-Apr-16      | Rhinolophus ferrumequinum, Murina leucogaster   |                | 1     | 2         |
| 15    | Jeju     | SC cave           | 28-Apr-16      | Rhinolophus ferrumequinum                       |                | 1     | 1         |
| 16    | Jeju     | MSB cave          | 28-Apr-16      | Rhinolophus ferrumequinum                       | 1              |       |           |
|       |          |                   | 19-Aug-16      |                                                 |                |       | 2         |

|    |            |                |           |                                                 |    |   |   |
|----|------------|----------------|-----------|-------------------------------------------------|----|---|---|
|    |            |                | 05-Nov-16 |                                                 |    | 1 | 1 |
| 17 | Youngju    | deserted house | 10-May-16 | unknown                                         | 1  |   |   |
| 18 | Munhyung   | BGA cave       | 18-May-16 | Rhinolophus ferrumequinum                       | 1  |   | 3 |
| 19 | Munhyung   | BGS cave       | 18-May-16 | Miniopterus                                     | 4  | 1 | 3 |
| 20 | Hampeong   | JC cave        | 25-May-16 | Rhinolophus ferrumequinum                       | 2  | 2 | 1 |
| 21 | Munhyung   | UL cave        | 29-May-16 | Rhinolophus ferrumequinum, Murina leucogaster   | 2  | 2 | 2 |
| 22 | Jeju       | GR cave        | 09-Jun-16 | Miniopterus                                     | 1  | 1 | 2 |
| 23 | Kyungju    | SC bridge      | 15-Jun-16 | Hypsugo alaschanicus                            | 3  |   |   |
| 24 | Jungsun    | SM cave        | 19-Jun-16 | Murina ussuriensis                              | 3  |   | 1 |
|    |            |                | 27-Jun-16 |                                                 | 4  |   |   |
|    |            |                | 18-Jul-16 |                                                 | 2  |   |   |
| 25 | Danyang    | HSA bridge     | 11-Sep-16 | Eptesicus serotinus                             | 2  |   |   |
|    |            |                | 02-Oct-16 |                                                 | 1  |   |   |
| 26 | Chungju    | CS cave        | 28-Jun-16 | Rhinolophus ferrumequinum                       | 5  |   |   |
| 27 | Danyang    | HA bridge      | 28-Jun-16 | Eptesicus serotinus                             | 3  |   | 2 |
| 28 | Danyang    | SM cave        | 28-Jun-16 | Rhinolophus ferrumequinum                       | 1  |   |   |
| 29 | Donghae    | SH temple      | 13-Jul-16 | Hypsugo alaschanicus                            | 2  |   |   |
|    |            |                | 16-Jul-16 |                                                 | 2  |   |   |
| 30 | Yeongwol   | GS cave        | 24-Sep-16 | Murina ussuriensis                              | 2  |   |   |
| 31 | Pyungchang | BR cave        | 16-Jul-16 | Murina ussuriensis                              | 2  |   |   |
| 32 | Yeongwol   | WS bridge      | 19-Jul-16 | Eptesicus serotinus                             | 5  |   | 1 |
| 33 | Yeongwol   | OJ cave        | 19-Jul-16 | Rhinolophus ferrumequinum, Murina ussuriensis   | 12 | 1 | 2 |
| 34 | Pyungchang | S cave         | 20-Jul-16 | Rhinolophus ferrumequinum, Murina ussuriensis   | 5  |   |   |
| 35 | Pyungchang | SR cave        | 20-Jul-16 | unknown                                         | 1  |   |   |
| 36 | Jeju       | HH cave        | 19-Aug-16 | Rhinolophus ferrumequinum                       | 1  |   | 1 |
|    |            |                | 20-Aug-16 |                                                 | 2  |   |   |
| 37 | Jeju       | KNBLM cave     | 04-Nov-16 | Rhinolophus ferrumequinum, Myotis macrodactylus |    | 2 | 3 |
| 38 | Jungsun    | WP cave        | 24-Sep-16 | Rhinolophus ferrumequinum                       | 1  | 1 | 1 |
| 39 | Jungsun    | HM cave        | 24-Sep-16 | Rhinolophus ferrumequinum                       |    | 1 | 1 |
| 40 | Jungsun    | BR cave        | 25-Sep-16 | Rhinolophus ferrumequinum                       | 1  | 1 | 1 |

|       |            |          |           |                            |   |     |   |
|-------|------------|----------|-----------|----------------------------|---|-----|---|
| 41    | Jungsun    | GAU cave | 16-Oct-16 | Rhinolophus ferrumequinum  | 1 |     | 1 |
| 42    | Jungsun    | GJ cave  | 22-Oct-16 | Rhinolophus ferrumequinum  |   | 1   | 1 |
| 43    | Jungsun    | YM cave  | 23-Oct-16 | Rhinolophus ferrumequinum, | 1 | 1   | 1 |
|       |            |          | 20-Nov-16 | Myotis daubentoni          | 3 | 1   | 1 |
| 44    | Jeju       | WH cave  | 05-Nov-16 | Miniopterus                | 3 |     |   |
| 45    | Pyungchang | GCS cave | 07-Dec-16 | Rhinolophus ferrumequinum  |   | 1   | 2 |
| 46    | Okchun     | GJR cave | 11-Dec-16 | Rhinolophus ferrumequinum  |   | 1   | 1 |
| 47    | Seogwipo   | BLR cave | 05-Nov-16 | Rhinolophus ferrumequinum, | 1 |     |   |
|       |            |          | 14-Dec-16 | Miniopterus                |   | 2   | 2 |
| 48    | Sangju     | SJY cave | 25-Dec-16 | Rhinolophus ferrumequinum  |   | 1   | 1 |
| total |            |          |           |                            |   | 232 |   |

The abbreviations list: HG: Ho Gye, BT: Be Ti, USJ: Us San Jeon, MJ: Man Jang, HDR: Han Deu Reu, HPDPN: Hwa Pyo Dong Pi Nan, SJ: Sib Ja, UJD: U Jeog Dong, SP: Seog Po, IS: I Seong, G: Geum, G: Gom, SC: So Cheon, MSB: Myo San Bong, BGA: Bu Gog Am, BGS: Bu Gog Sus, JC: Jeong Chang, UL: U Lo, GR: Gu Rin, SC: Sin Cheon, SM: Saem Mul, HSA: Ha Seon Am, CS: Cheong Seog, HA: Heung Am, SM: Seol Ma, SH: Sam Hwa, GS: Go Ssi, BR: Baeg Ryong WS: Wa Seog, OJ: Ong Jeong, S: Ssang, SR: Sa Rang, HH: Hwa Heul, KNBLM: Gim Nyeong Bil Le Mos, WP: Wol Pyeong, HM: Haeng Mae, BR: Bi Ryong, GAU: Gul A U, GJ: Gol Ji, YM: Ya Mi, WH: Wa Heul, GCS: Gwang Cheon Seon, GJR: Gwang Ju Ri, BLR: Beol La Ri, SJY: Sang Ju Yong

**Supplementary figure S1.** Phylogenetic analysis based on the amino acid sequences of the M (A), F (B), and HN (C) proteins of the bat paramyxovirus B16-40 and other reference viruses belonging to Paramyxoviridae. The phylogenetic tree was generated by the maximum-likelihood method with 1,000 replicates of bootstrap sampling and the Jones-Taylor-Thornton (JTT) model using MEGA.<sup>1,2</sup> The bat paramyxovirus B16-40 isolated in this study is denoted by the red box.

### A. Matrix

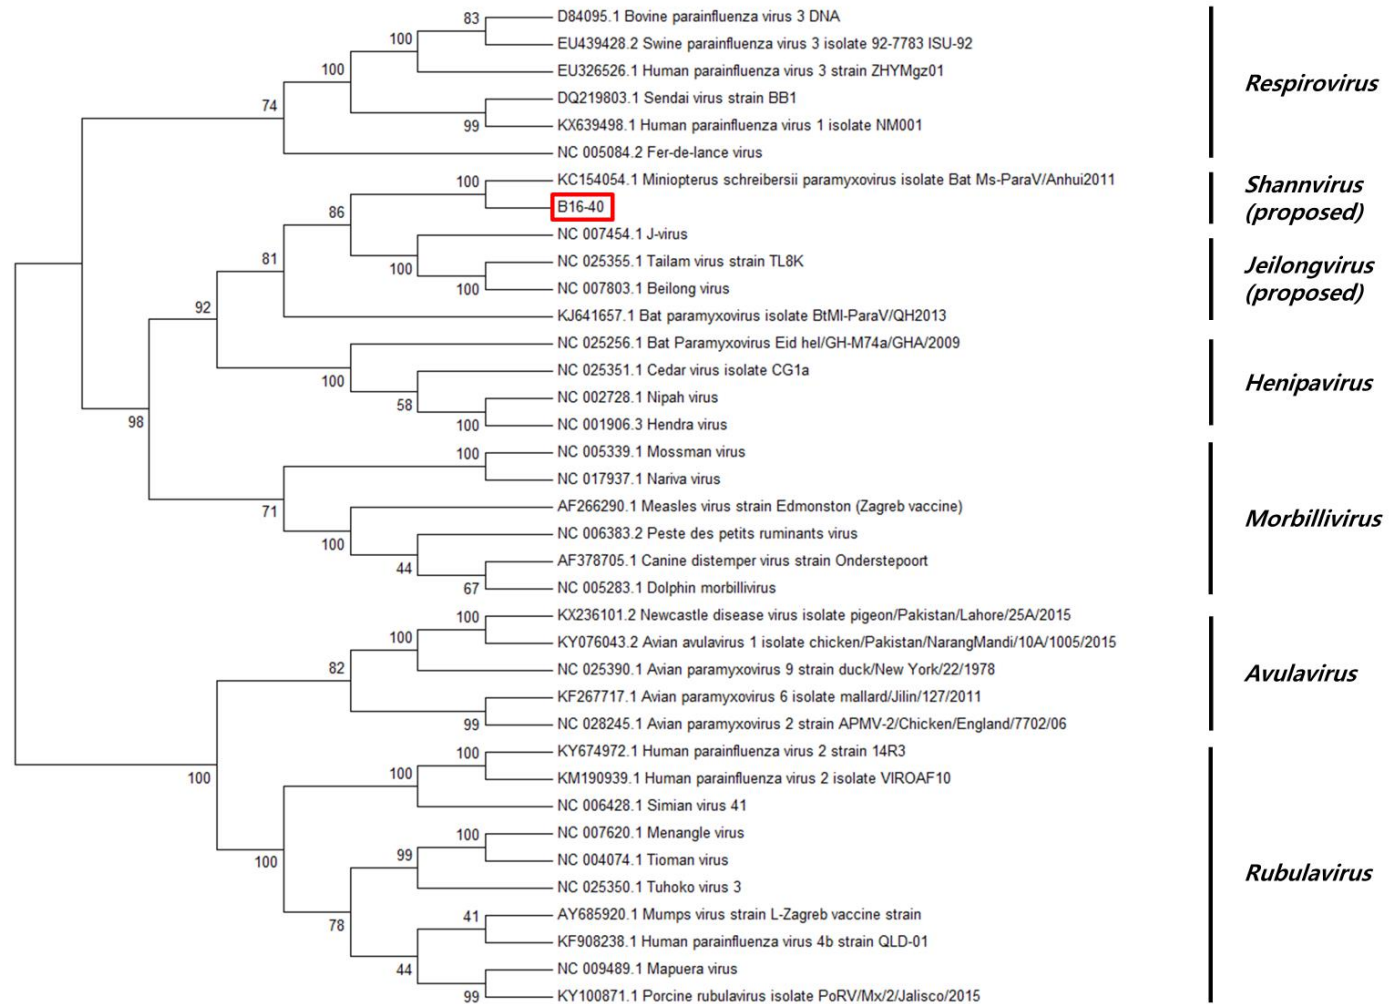

## B. Fusion

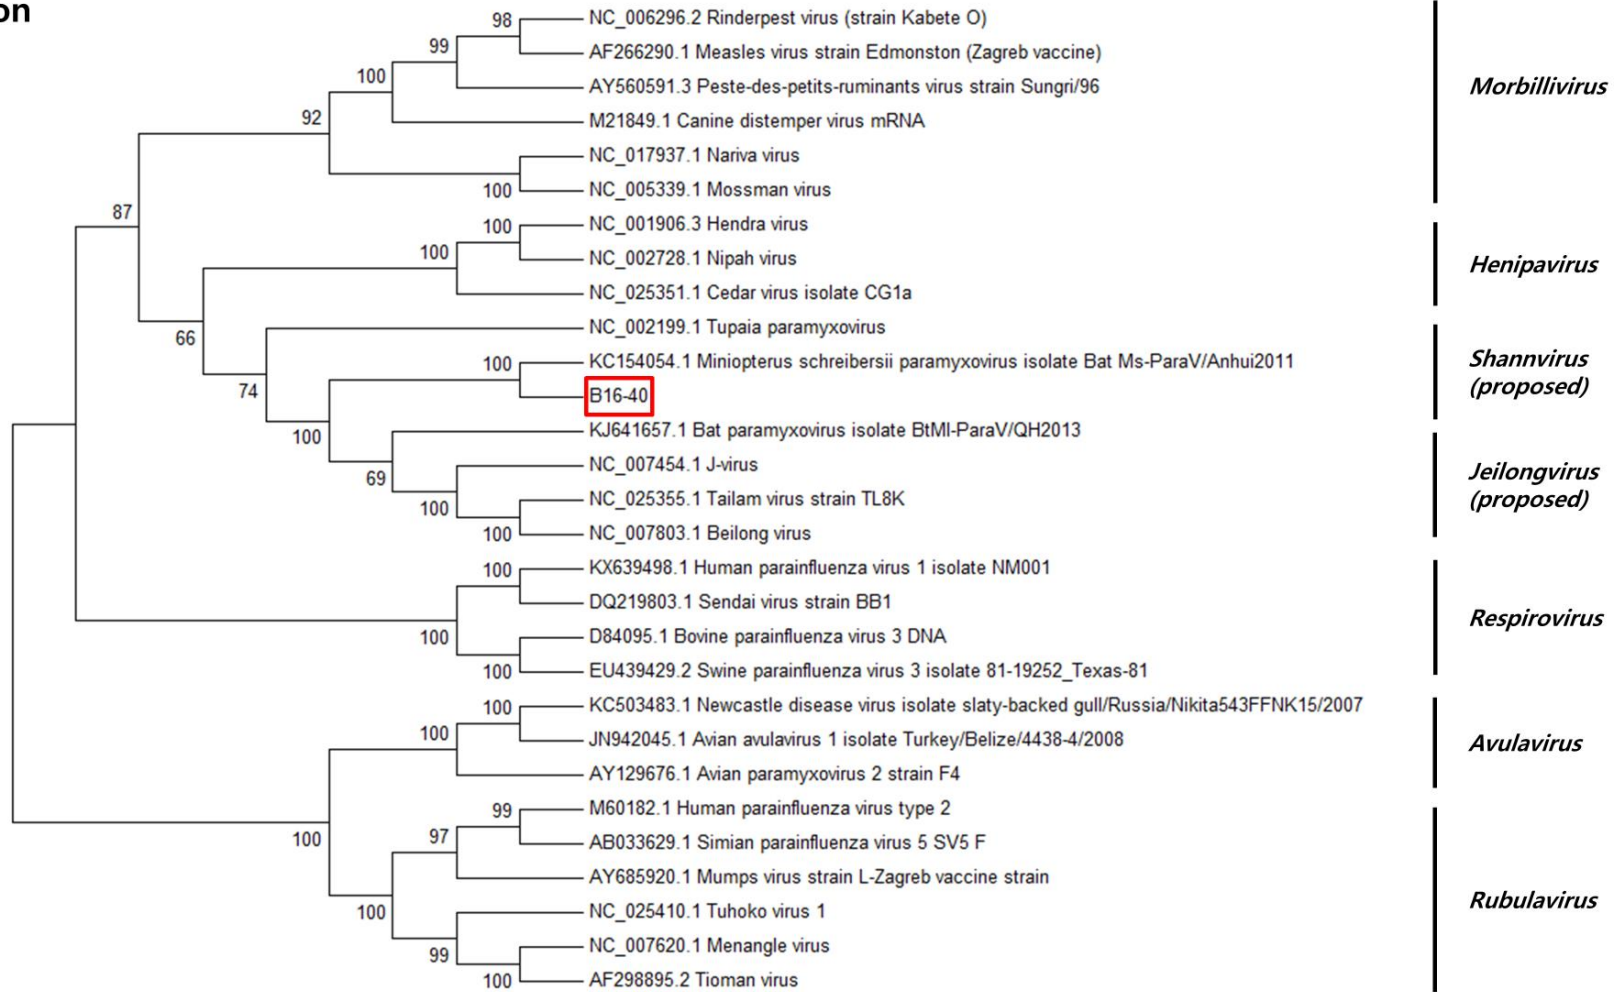

C. HN

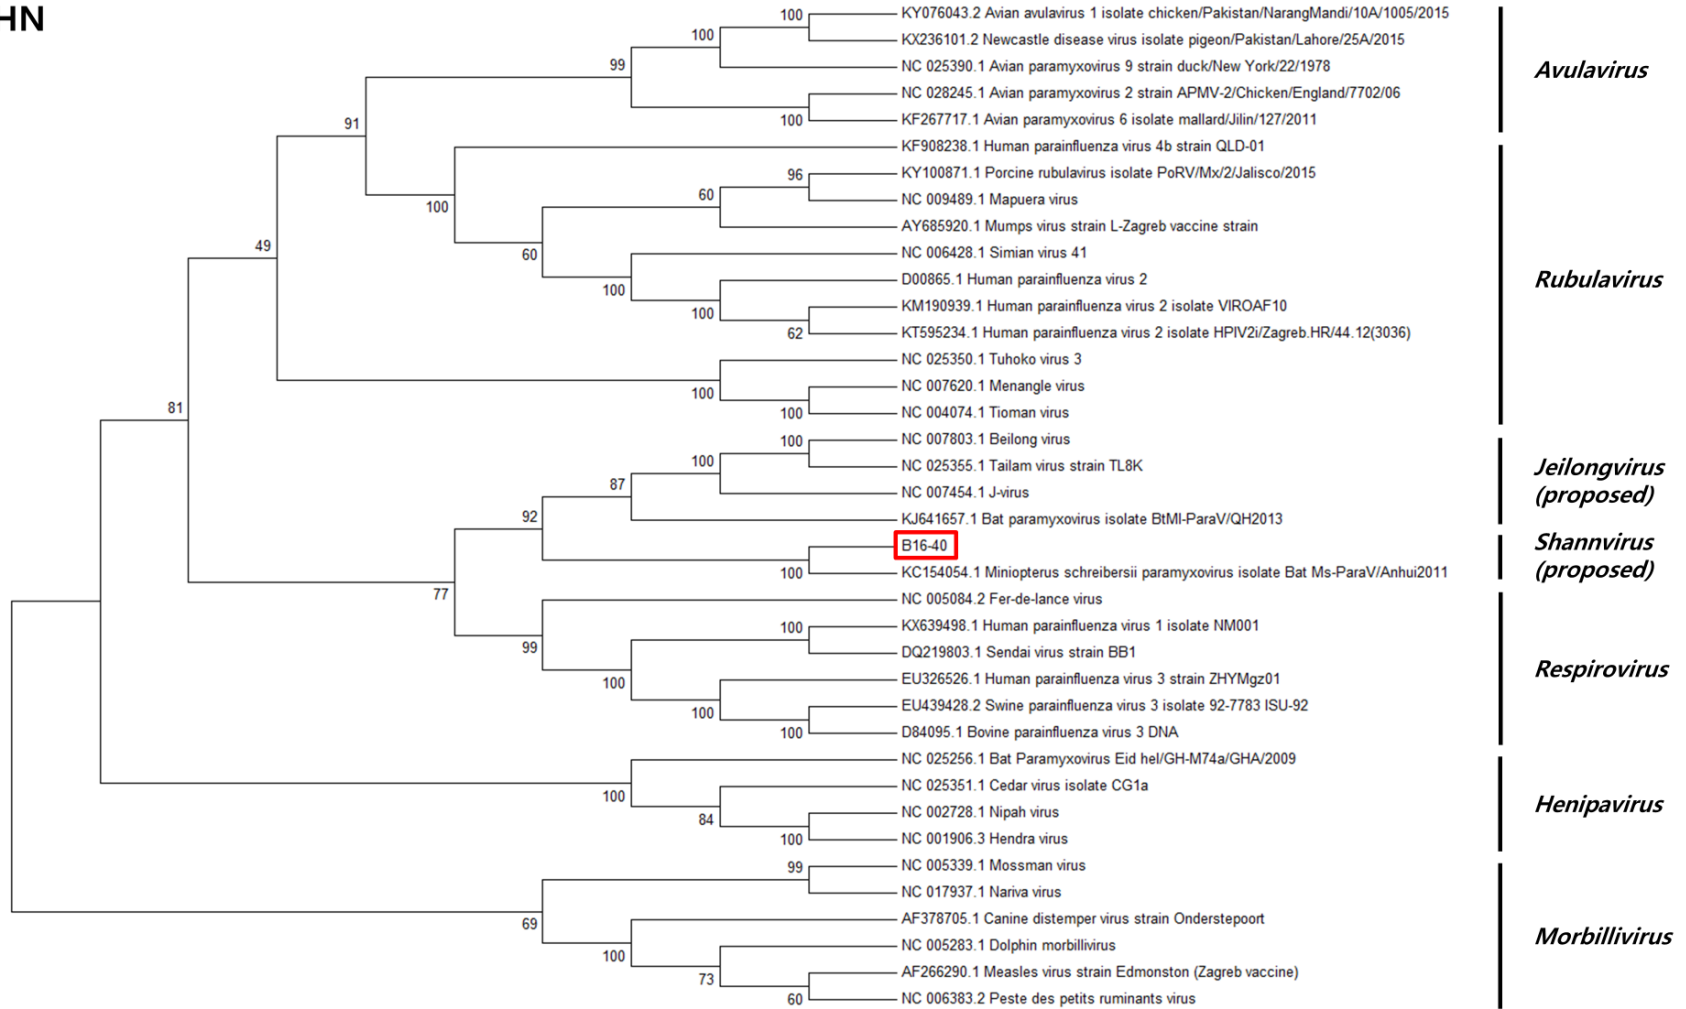



**Supplementary figure S2. A.** Amino acid sequence alignment of the HN proteins from the human parainfluenza virus 1 (KBPV-VR-44) and bat paramyxovirus (B16-40) using the BioEdit program. The sialidase superfamily domain predicted by the NCBI Protein BLAST search is indicated by red arrows ([https://blast.ncbi.nlm.nih.gov/Blast.cgi?PROGRAM=blastp&PAGE\\_TYPE=BlastSearch&LINK\\_LOC=blasthome](https://blast.ncbi.nlm.nih.gov/Blast.cgi?PROGRAM=blastp&PAGE_TYPE=BlastSearch&LINK_LOC=blasthome)). The conserved region of at least six amino acids in the HN amino acid sequences are indicated by red boxes. Neuraminidase activate sites (R, D, E, R, R, Y, and E) are indicated by blue arrows.<sup>3-7</sup> **B.** The location of the conserved amino acid sequences in the HN protein structure visualized and merged using the Chimera 1.11.2 program. The gold-colored structure is predicted from the HN protein sequence of the human parainfluenza virus 1 (KBPV-VR-44), and the blue-colored one is predicted from the bat paramyxovirus B16-40. The conserved regions of at least six amino acids are indicated with the corresponding conserved sequences in five different colors (red, yellow, green, blue, and purple).<sup>8</sup>

### A. Amino acids sequence alignment of HN proteins between hPIV1 and bat paramyxovirus B16-40

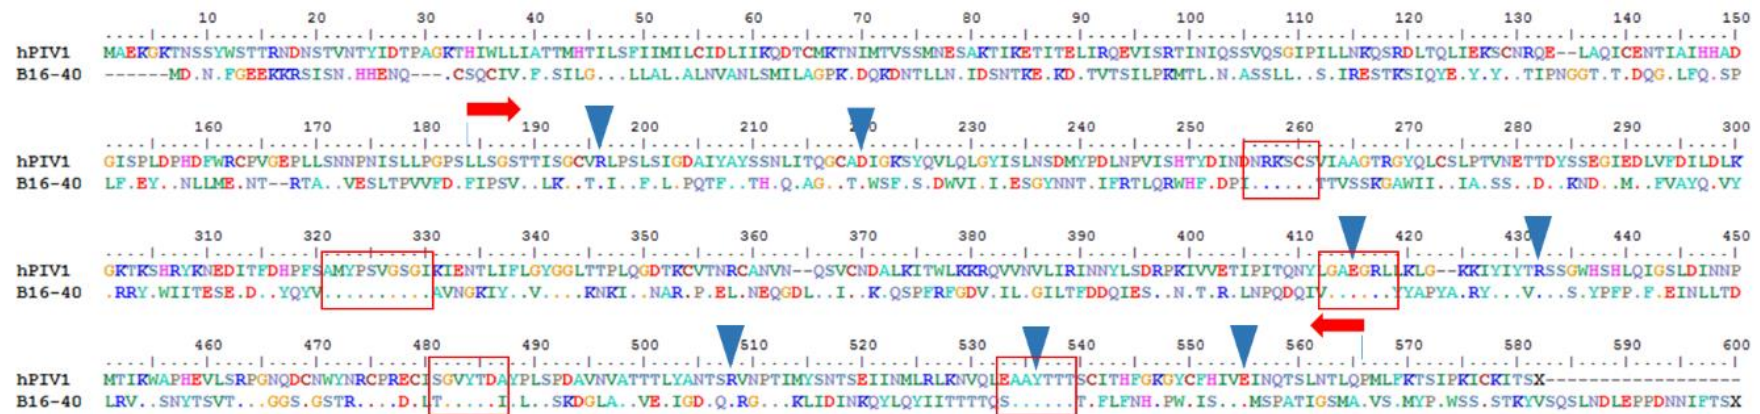

- ▶ Red arrows indicate sialidase superfamily domain predicted by NCBI Protein BLAST search.  
: e-value : 2.94e-146, cl21531
- ▶ Red Boxes indicates conserved sites (more than six amino acids)
- ▶ Blue arrows indicates neuraminidase activate sites (R D E R R Y E)



## B. Location of the conserved Amino acids sequences on the HN proteins structure

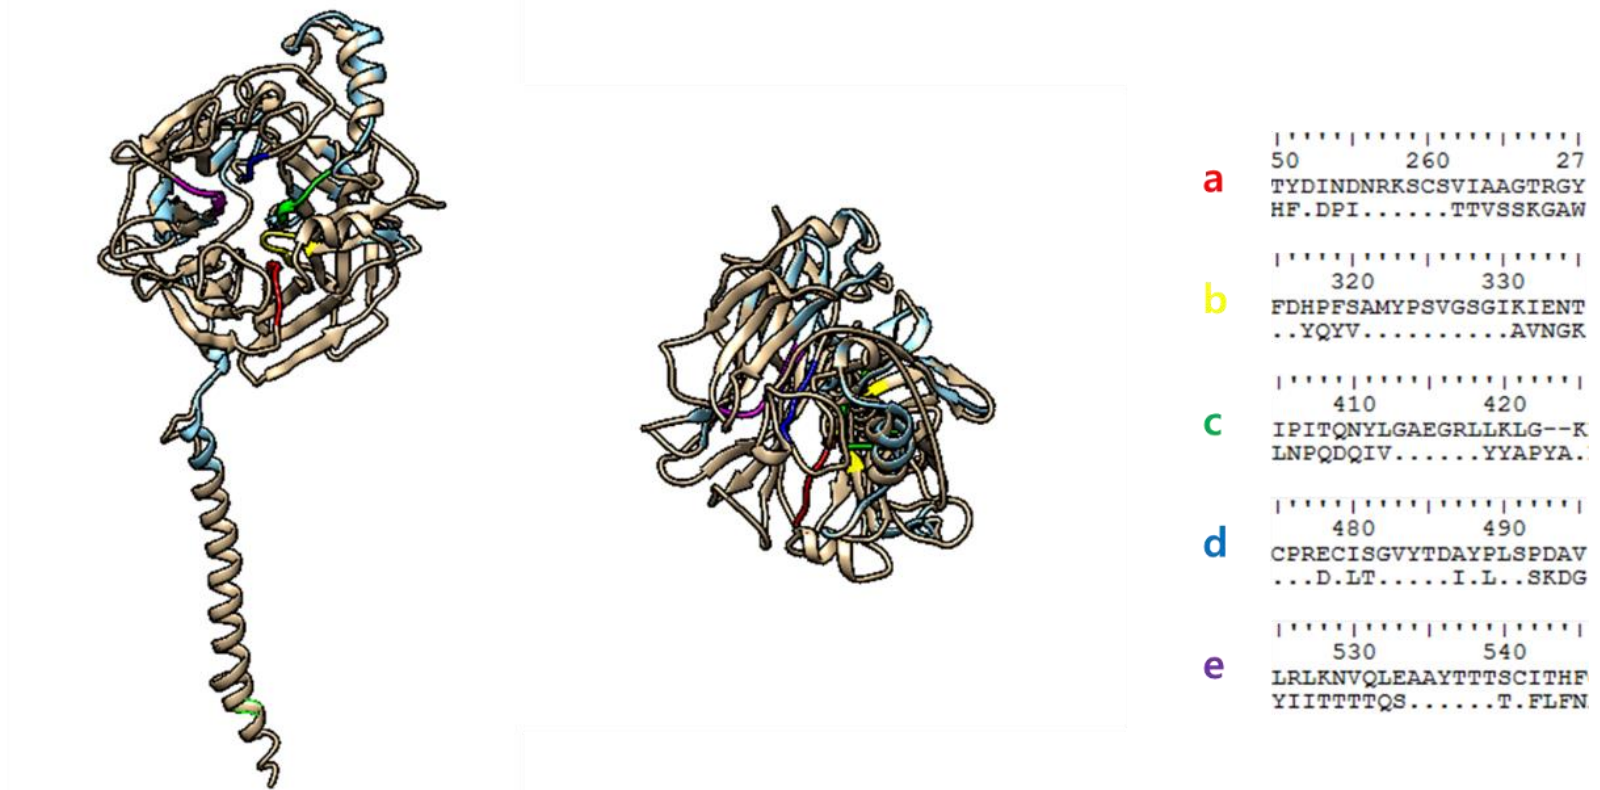

► HN structures of bat paramyxovirus B16-40 and human parainfluenza virus 1 were predicted using Phyre2 web portal, and visualized and merged using Chimera 1.11.2 program.

► Gold-colored structure predicted from human parainfluenza virus 1 (KBPV-VR-44) and Blue-colored one done from bat paramyxovirus B16-40

## References

1. Katoh K, Standley DM. MAFFT multiple sequence alignment software version 7: Improvements in performance and usability. *Mol Biol Evol.* 2013;30.4:772–780. <https://doi.org/10.1093/molbev/mst010>
2. Tamura K, Stecher G, Peterson D, Filipski A, Kumar S. MEGA6: Molecular Evolutionary Genetics Analysis Version 6.0. *Mol Biol Evol.* 2013;30:2725–2729. <https://doi.org/10.1093/molbev/mst197>
3. Thompson, J. D., Higgins, D. G., & Gibson, T. J. CLUSTAL W: improving the sensitivity of progressive multiple sequence alignment through sequence weighting, position-specific gap penalties and weight matrix choice. *Nucleic acids research.* 1994;22(22):4673-4680. <https://doi.org/10.1093/nar/22.22.4673>
4. Marchler-Bauer, A., Bo, Y., Han, L., He, J., Lanczycki, C. J., Lu, S., et al. CDD/SPARCLE: functional classification of proteins via subfamily domain architectures. *Nucleic acids research.* 2016;45(D1): D200-D203. <https://doi.org/10.1093/nar/gkw1129>
5. Marchler-Bauer, A., Derbyshire, M. K., Gonzales, N. R., Lu, S., Chitsaz, F., Geer, L. Y., et al. CDD: NCBI's conserved domain database. *Nucleic acids research.* 2014;43(D1):D222-D226. <https://doi.org/10.1093/nar/gku1221>
6. Marchler-Bauer, A., Lu, S., Anderson, J. B., Chitsaz, F., Derbyshire, M. K., DeWeese-Scott, C., et al. CDD: a Conserved Domain Database for the functional annotation of proteins. *Nucleic acids research.* 2010;39(suppl\_1):D225-D229. <https://doi.org/10.1093/nar/gkq1189>
7. Marchler-Bauer, A., & Bryant, S. H. CD-Search: protein domain annotations on the fly. *Nucleic acids research.* 2004;32(suppl\_2):W327-W331. <https://doi.org/10.1093/nar/gkh454>
8. Kelley, L. A., Mezulis, S., Yates, C. M., Wass, M. N., & Sternberg, M. J. The Phyre2 web portal for protein modeling, prediction and analysis. *Nature protocols.* 2015;10(6): 845-858. <https://doi.org/10.1038/nprot.2015.053>
